# Supplementary material for: DRESS syndrome in response to Denosumab: First documented case report
Source: PubMed Central journal article supplement — Bone Rep. 2019 Dec 13;12:100239. doi: 10.1016/j.bonr.2019.100239 (PMC6933223; doi:10.1016/j.bonr.2019.100239), 2019-12-13
Supplement: mmc1.pdf [file mmc1.pdf]

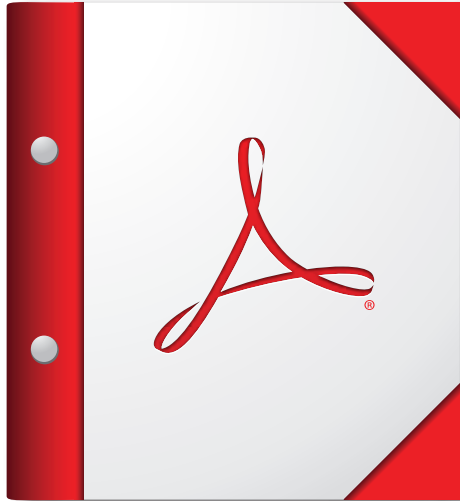

**For the best experience, open this PDF portfolio in  
Acrobat X or Adobe Reader X, or later.**

[Get Adobe Reader Now!](#)
